# Supplementary material for: A Model of Cardiovascular Disease Giving a Plausible Mechanism for the Effect of Fractionated Low-Dose Ionizing Radiation Exposure
Source: PLoS Comput Biol. 2009 Oct 23;5(10):e1000539. doi: 10.1371/journal.pcbi.1000539 (PMC2759077; doi:10.1371/journal.pcbi.1000539)
Supplement: Table S2 — Parameters and estimated values. (0.35 MB DOC) [file pcbi.1000539.s003.doc]

**Table S2. Parameters and estimated values.**

| Variable | Description | Value | Equation | References |
| --- | --- | --- | --- | --- |
|  | Rate (per unit radical concentration) of oxidation of LDL (with oxidation state ) | 3 x 10-6 M-1 s-1 | A.1, A.2, A.5 | Ingold *et al.* [32], Cobbold *et al.* [22] |
| Rate (per unit radical concentration) of oxidation of nearly fully oxidized LDL (with oxidation state ) | 6 x 10-11 M-1 s-1 | A.1, A.2, A.5 | Ingold *et al.* [32], Cobbold *et al.* [22] |
|  | Rate (per unit radical concentration) of oxidation of HDL (with oxidation state ) | 4x 10-7 M-1 s-1 | A.3, A.4, A.5 | Cobbold *et al.* [22] |
| Rate (per unit radical concentration) of oxidation of nearly fully oxidized HDL (with oxidation state ) | 7.9 x 10-12 M-1 s-1 | A.3, A.4, A.5 | Cobbold *et al.* [22] |
|  | Rates (per unit anti-oxidant concentration) of de-oxidation of LDL (with oxidation state ) | 1.55 x 10-6 M-1 s-1 | A.1, A.2, A.6 | Packer *et al.* [33], Jialal *et al.* [34] |
|  | Rates (per unit anti-oxidant concentration) of de-oxidation of HDL (with oxidation state ) | 2.0 x 10-7 M-1 s-1 | A.3, A.4, A.6 | Packer *et al.* [33], Jialal *et al.* [34] |
|  | Function describing rate of conversion per unit of fully oxidized LDL and per unit macrophage concentration to lipid-bound LDL (i.e. to LDL ingested into macrophages)(function of bound lipid to macrophage ratio ) | - | A.19, 7 | McKay *et al.* [1] |
|  | Bound lipid ingestion rate at zero lipid concentration | 5.3 x 10-10 cell-1 ml s-1 | A.21, A.23 | Crouse *et al.* [35], Schwegler *et al.* [36], Zhao *et al.* [26]a |
|  | Limiting bound lipid ingestion rate at high lipid concentration | 2.7 x 10-10 cell-1 ml s-1 | A.23 | Crouse *et al.* [35], Schwegler *et al.* [36], Zhao *et al.* [26]a |
|  | Denominator scaling constant in bound lipid ingestion rate function, | ? | A.21 |  |
|  | Exponential scaling constant in bound lipid ingestion rate function, | 2.1 x 102 cell M -1 | A.21, A.23 | Crouse *et al.* [35], Schwegler *et al.* [36], Zhao *et al.* [26]a |
|  | Rate of reduction of free radical as a result of oxidation reactions with vitamin E and HDL | ? | A.11 |  |
|  | Rate of reduction of anti-oxidant as a result of anti-oxidation reactions with vitamin E and LDL or HDL | ? | A.12 |  |
|  | Maximum number of oxidized LDL species (maximum number of vitamin E molecules+1) | 7-16 | A.7, A.11, A.12, 1, 2 | Esterbauer *et al.* [5], Cobbold *et al.* [22] |
|  | Maximum number of oxidized HDL species (maximum number of vitamin E molecules+1) | 2 | A.9, A.11, A.12 | Cobbold *et al.* [22] |
|  | Repopulation rate of endothelial cells | 4.6 x 10-6 s-1 | A.13, 1 | Sachs & Brenner [37] |
|  | Rates of damage of endothelial cells per unit of LDL concentration with oxidation status | 0 for  6.1 x 101 ml M-1 s-1 for | A.13, A.14, 1, 2 | Crouse *et al.* [35], Thomas *et al.* [38], Liu *et al.* [39], Steffen *et al.* [40]b |
|  | Target EC concentration | 1.3 x 109 cells ml-1 | A.13, 1 | McGeachie [41] |
|  | Chemo-attractant production rates per unit concentration of damaged ECs | 5.7 x 10-24 Mcell-1 s-1 | A.15, 3 | Filler *et al.* [42]c: MCP-1 |
|  | Chemo-attractant production rates per unit concentration of macrophages | 2.0 x 10-25 Mcell-1 s-1 | A.15, 3 | Bosco *et al.* [43], Yoo *et al.* [44]d: MCP-1 |
|  | Chemo-attractant production rates per unit concentration of T-cells | 0 Mcell-1 s-1 | A.15, 3 | Villiger *et al.* [45]: IL6, Lukacs *et al.* [46]: MCP-1 |
|  | Chemo-attractant production rates per unit concentration of VSMCs | ? Mcell-1 s-1 | A.15 |  |
|  | Monocyte proliferation factor production rate per unit of T-lymphocyte concentration | 9.1 x 10-25 Mcell-1 s-1 | A.16, 4 | Tang *et al.* [47], Knowles [48], Frétier *et al.* [49]e: M-CSF |
|  | Monocytemacrophage proliferation/conversion rate | 3.5 x 109 ml M-1 s-1 | A.17, A.18, 5, 6 | Becker *et al.* [50]f: M-CSF |
|  | Monocyte proliferation rate per unit of proliferation factor | 3.5 x 109 ml M-1 s-1 | A.17, 5 | Becker *et al.* [50]f: M-CSF |
|  | Death/degradation rates of damaged ECs | 1 x 10-4 s-1 | A.14, 2 | Dimmeler *et al.* [51] |
|  | Death/degradation rates of VSMCs | 1 x 10-5 s-1 | A.25 | McKay *et al.* [1] |
|  | Death/degradation rates of T-cells | 6.9 x 10-7 s-1 | A.20, A.27, 8, 9 | Asquith *et al.* [52] |
|  | Lumenal T-lymphocyte concentration | 2.5 x 106 cells ml -1 | 15, 18 | Hanson [53] |
|  | Lumenal monocyte concentration | 3.0 x 105 cells ml -1 | 12, 17 | Hanson [53] |
|  | Function describing rate of release of bound lipid due to macrophage death (per unit of bound lipid concentration and per macrophage concentration) (function of bound lipid to macrophage ratio ) | - | A.18, A.19, 6, 7, 9 | McKay *et al.* [1] |
|  | Underlying macrophage mortality rate | 9.3 x 10-7 s-1 | A.22, A.24 | Crouse *et al.* [35], Schwegler *et al.* [36], Kellner-Weibel *et al.* [54]g |
|  | Scaling constant in macrophage death rate function, | 7.7 x 1013 cell M-1s-1 | A.22, A.24 | Crouse *et al.* [35], Schwegler *et al.* [36], Kellner-Weibel *et al.* [54]g |
|  | Function determining influx of monocytes as function of MCP-1 concentration, lumenal monocyte concentration | - | 12, 17 |  |
|  | Parameter in function determining constant influx of monocytes as function of lumenal monocyte concentration | 1.7 x 108 m-2 | 17 | Takaku *et al.* [55]h |
|  | Parameter in function determining influx of monocytes as function of MCP-1 concentration, lumenal monocyte concentration | 2.5 x 1013 M-1 ml m-2 | 17 | Takaku *et al.* [55]h |
|  | Threshold chemo-attractant level for monocyte flux into intima | ? Mml-1 | 17 |  |
|  | Function determining influx of T-lymphocytes as function of MCP-1 concentration, lumenal T-lymphocyte concentration | - | 15, 18 |  |
|  | Parameter in function determining constant influx of T-lymphocytes as function of lumenal T-lymphocyte concentration | 7.3 x 107 m-2 | 18 | Klouche *et al.* [56], Takaku *et al.* [55]i |
|  | Parameter in function determining influx of T-lymphocytes as function of MCP-1 concentration, lumenal T-lymphocyte concentration | 8.9 x 1012 M-1 ml m-2 | 18 | Klouche *et al.* [56], Takaku *et al.* [55]i |
|  | Threshold chemo-attractant level for T-lymphocyte flux into intima | ? Mml-1 | 18 |  |
|  | Chemo-attractant degradation rate per unit macrophage concentration | 1.3 x 10-5 ml cell-1 s-1 | A.15, 3 | Han *et al.* [57], Seet *et al.* [58], Cullen *et al.* [59]: MCP-1j |
|  | Chemo-attractant degradation rate per unit T-cell concentration | 1.3 x 10-5 ml cell-1 s-1 | A.15, 3 | Han *et al.* [57], Seet *et al.* [58], Cullen *et al.* [59]: MCP-1j |
|  | Chemo-attractant degradation rate per unit monocyte concentration | 1.3 x 10-5 ml cell-1 s-1 | A.15, 3 | Han *et al.* [57], Seet *et al.* [58], Cullen *et al.* [59]: MCP-1j |
|  | Power of in bound lipid ingestion rate function, | ? | A.21 |  |
|  | Power of in macrophage death rate function, | 1 | A.22 |  |
|  | Collagen augmentation rate per unit of VSMC concentration | ? | A.26 |  |
|  | Degradation rate of VSMC due to mechanical stress | ? | A.25 |  |
|  | Destruction/degradation rates of collagen per unit T-cell concentration | ? | A.26 |  |
|  | Destruction/degradation rates of collagen per unit macrophage concentration | ? | A.26 |  |
|  | Ratio of rate of augmentation of necrotic core by dying macrophages (multiplier of ) | 1.5 x 10-8 M cell-1 | A.27, 9 | Krombach *et al.* [60]k |
|  | Multiplier of VSMC for volume of necrotic core | 1M cell-1 | A.27 | McKay *et al.* [1] |
|  | Ratio of rate of augmentation of necrotic core by T-cell death | 2.1 x 10-10 M cell-1 | A.27, 9 | Cheung *et al.* [61]l |
|  | Rate of diffusion of LDL (with oxidation state ) in intima | 5.6 x 10-12 m2 s-1 | A.1, A.2 | Crouse *et al.* [35]m |
|  | Rate of diffusion of HDL (with oxidation state ) in intima | 1.9 x 10-11 m2 s-1 | A.3, A.4 | Atmeh [62]m |
|  | Rate of diffusion of radicals in intima | ? m2 s-1 | A.5 |  |
|  | Rate of diffusion of anti-oxidants in intima | ? m2 s-1 | A.6 |  |
|  | Rate of diffusion of LDL (with oxidation state ) in lumen | ? m2 s-1 | A.7, A.8 |  |
|  | Rate of diffusion of HDL (with oxidation state ) in lumen | ? m2 s-1 | A.9, A.10 |  |
|  | Rate of diffusion of radicals in lumen | ? m2 s-1 | A.11 |  |
|  | Rate of diffusion of anti-oxidants in lumen | ? m2 s-1 | A.12 |  |
|  | Rate of diffusion of chemo-attractant | 3.9 x 10-11 m2 s-1 | A.15, 3 | Chandrasekhar [63]m: MCP-1n |
|  | Rate of diffusion of monocyte proliferation factor | 1.8 x 10-11 m2 s-1 | A.16, 4 | Chandrasekhar [63]m, Suzu *et al.* [64]: M-CSF |
|  | Rate of diffusion of monocytes | 3.0 x 10-15 m2 s-1 | A.17, 5 | Chandrasekhar [63]m, Lund *et al.* [65], Shin *et al.* [66] |
|  | Rate of diffusion of macrophages | 2.9 x 10-15 m2 s-1 | A.18, A.19, 6 | Chandrasekhar [63]m, Krombach *et al.* [60], Shin *et al.* [66]o |
|  | Rate of diffusion of T-cells | 6.2 x 10-15 m2 s-1 | A.20, 8 | Chandrasekhar [63]m, Cheung *et al.* [61] |
|  | Rate of diffusion of VSMCs | ? m2 s-1 | A.25 |  |
|  | Chemotactic factor associated with monocytes | 3.0 x 100 m2 ml s-1 M-1 | A.17, 5 | Lauffenburger *et al.* [67] |
|  | Chemotactic factor associated with macrophages | 3.0 x 100 m2 ml s-1 M-1 | A.18, 6, 7 | Lauffenburger *et al.* [67] |
|  | Chemotactic factor associated with T-cells | 3.0 x 100 m2 ml s-1 M-1 | A.20, 8 | Lauffenburger *et al.* [67] |
|  | Chemotactic factor associated with VSMCs | ? m2 ml s-1 M-1 | A.25 |  |

abased on fitting (via non-linear least squares) to data in Figure 3 of Zhao *et al.* [26], integrating d(**/*M*)/dt = **in(**/*M*)*L*0 (derived *via* equation (7)), using the functional form (A.23), and using LDL molecular weight of 2.93 x 106 [35] and estimate of 136 pg protein/cell [36].

bgeometric mean of figures derived from papers of Thomas *et al.* [38], Liu *et al.* [39], Steffen *et al.* [40], using LDL molecular weight of 2.93 x 106 [35] to convert to molar concentrations.

cfigures derived from paper of Filler *et al.* [42], and using also estimate (*via* website <http://www.exalpha.com/pdfs/X1243C.pdf>) of MCP-1 molecular weight of 8.7 kD to convert to molar concentration.

dgeometric mean of figures derived from papers of Yoo *et al.* [44] (IL-18 stimulated and unstimulated cells), Bosco *et al.* [43] (normal and hypoxic cells), and using also estimate (*via* website <http://www.exalpha.com/pdfs/X1243C.pdf>) of MCP-1 molecular weight of 8.7 kD to convert to molar concentration.

efigure derived from paper of Frétier *et al.* [49], assuming that d*P*/dt = *PTT* - *kP* and using estimate of half-life of MCP-1, 50 mins [47] to estimate *k*; conversion factor of 1 activity unit M-CSF = 0.44 fM [48].

fassuming that d*m*/dt = *mT* - *MPm* , d*M*/dt = *MPm* – *km* and using also estimate of 1 activity unit of M-CSF = 0.44 fM, and M-CSF molecular weight of 70 kD [48].

gbased on LDL molecular weight of 2.93 x 106 [35] and estimate of 136 pg protein/cell [36].

hbased on fitting linked differential equations *Jm*(*C*,*m*) = d*m*/dt = *Dm*[*β*0,*m*+*β*1,*mC*]*mL*,d*mL*/dt = -*Dm*[*β*0,*m*+*β*1,*mC*]*mL* to data in Figure 4 of Takaku *et al.* [55].

ibased on scaling of differential equation *JT*(*C*,T) = d*T*/dt = *Dm*[*β*0,*T*+*β*1,*TC*]*mT* from one for monocytes fitted to data in Figure 4 of Takaku *et al.* [55], using ratios of control and 25 g ml-1 E-LDL percentage transmigrations for T-lymphocytes and monocytes from data in Figure 4 of Klouche *et al.* [56].

jbased on a 1-point binding concentration, *Kd*, estimated by Cullen *et al.* [59] as 1.2 x 10-24 Mml-1 cell-1 (average of control levels in Figures 1, 2), an estimated 5000 CCR2 receptors for MCP-1 per cell [57] and an ORFZ- NZ2-CPB-MCP-1 dissociation rate of 1.86 x 10-3 s-1 [58].

kfigure derived from macrophage diameter given in Krombach *et al.* [60].

lfigure derived from T-lymphocyte volume given in Cheung *et al.* [61].

mbased on formula for diffusion coefficient *D* = *kT*/(6*r*) [63], where *k* = Boltzmann constant = 1.38065 x 10-23 J K-1, *T* = temperature = 310 K, ** = viscosity = 0.01 Pa s-1 [66], *r*=radius of molecule; this was adapted in some cases from values on the website [www.math.ubc.ca/~ais/website/status/diffuse.html](http://www.math.ubc.ca/~ais/website/status/diffuse.html), scaling by the inverse cube root of molecular weight relative to the value for IL-6.

nfigure derived from IL-6 diffusion coefficient and molecular weight (from website [www.math.ubc.ca/~ais/website/status/diffuse.html](http://www.math.ubc.ca/~ais/website/status/diffuse.html)), and estimate (via website <http://www.exalpha.com/pdfs/X1243C.pdf>) of MCP-1 molecular weight of 8.7 kD, using inverse cube-root scaling.

ogeometric mean of figures derived from papers of Krombach *et al.* [60], Shin *et al.* [66] and website [www.math.ubc.ca/~ais/website/status/diffuse.html](http://www.math.ubc.ca/~ais/website/status/diffuse.html).
