# Supplementary material for: A Model of Cardiovascular Disease Giving a Plausible Mechanism for the Effect of Fractionated Low-Dose Ionizing Radiation Exposure
Source: PLoS Comput Biol. 2009 Oct 23;5(10):e1000539. doi: 10.1371/journal.pcbi.1000539 (PMC2759077; doi:10.1371/journal.pcbi.1000539)
Supplement: Table S3 — Values for perturbed species. (0.07 MB DOC) [file pcbi.1000539.s004.doc]

**Table S3. Values for perturbed species.**

Values assumed for simulations of averaged perturbed species, using equations (42)-(48), as given in Figures 1-8.

| Variable | Description | Value | Reference/source |
| --- | --- | --- | --- |
|  | Oxidised LDL concentration in intima | 3.1 x 10-10 M ml-1 | Napoli *et al.* [68], Bing *et al.* [69]a |
|  | Unoxidised LDL concentration in intima | 4.9 x 10-6 M ml-1 | Henry *et al.* [70]b |
|  | Equilibrium value of chemo-attractant in intima | 7.9 x 10-15 M ml-1 | Cannon *et al.* [71]c |
|  | Standard deviation of equilibrium value of chemo-attractant in intima | 9.3 x 10-15 M ml-1 | Cannon *et al.* [71]c |
|  | Equilibrium value of monocytes in intima | 4.0 x 103 cells ml-1 | Navab *et al.* [72], Lichtman *et al.* [73]d |
|  | Perturbation of monocytes in intima | -2.4 x 103 cells ml-1 Gy-1 | Gordon [74], Navab *et al.* [72], Lichtman *et al.* [73]e |
|  | Normal equilibrium endothelial cell concentration | 1.3 x 109 cells ml-1 | McGeachie [41]f |
|  | Perturbation of normal endothelial cells | -8.4 x 108 cells ml-1 Gy-1 | Deschavanne & Fertil [75], McGeachie [41]g |
|  | Damaged equilibrium endothelial cell concentration | 7.1 x 107 cells ml-1 | Eq. (29) |
|  | Perturbation of damaged endothelial cells | -4.5 x 107 cells ml-1 Gy-1 | Deschavanne & Fertil [75], Eq. (29)g |
|  | Arterial endothelial cell cross sectional area | 2.8 x 10-7 m2 | McGeachie [41], Leung *et al.* [76]h |
|  | Cross sectional area of intima apart from endothelial cell layer | 8.5 x 10-6 m2 | Terry *et al.* [77], Leung *et al.* [76]i |

ageometric mean of figures derived from papers of Napoli *et al.* [68] and Bing *et al.* [69].

bmean of values for men and women in Table 1 of Henry *et al.* [70].

cfigures derived from paper of Cannon *et al.* [71], and using also estimate (*via* website <http://www.exalpha.com/pdfs/X1243C.pdf>) of MCP-1 molecular weight of 8.7 kD to convert to molar concentration.

dderived from monocyte concentration in blood from Lichtman *et al.* [73], and assuming 1% of these migrate to intima, as suggested by Figure 4 of Navab *et al.* [72].

eassuming 1% (via Navab *et al.* [72]) of value for monocytes in blood from Lichtman *et al.* [73] and assuming a cellular radio-sensitivity of 0.599 Gy-1 (=1/(1.67 Gy)) (Table 2 Gordon [74]).

fassuming endothelial cells are approximately rectangular cuboid with dimensions 15 m x 5 m x 10 m, packed in a layer 10 m high [41].

gderived from equilibrium value assuming a cellular radio-sensitivity of 0.633 Gy-1 (=1/(1.58 Gy)) (Table 2 Deschavanne and Fertil [75]).

hassuming endothelial cells are packed in a layer 10 m high [41], and assuming a coronary artery diameter of 4.49 x 10-3 m [76] implies an endothelial cell cross section of π x 0.00001 x 4.49 x 10-3 m2.

iassuming intima media thickness of 1.08 mm [77] and coronary arterial diameter of 4.49 x 10-3 m [76] implies an intimal cross section of π x [(0.00449+0.00108)2-0.004492]/4 m2.
